# Supplementary material
Source: publisher figshare collection journal article supplement (https://gsapubs.figshare.com/articles/dataset/_/14167292)

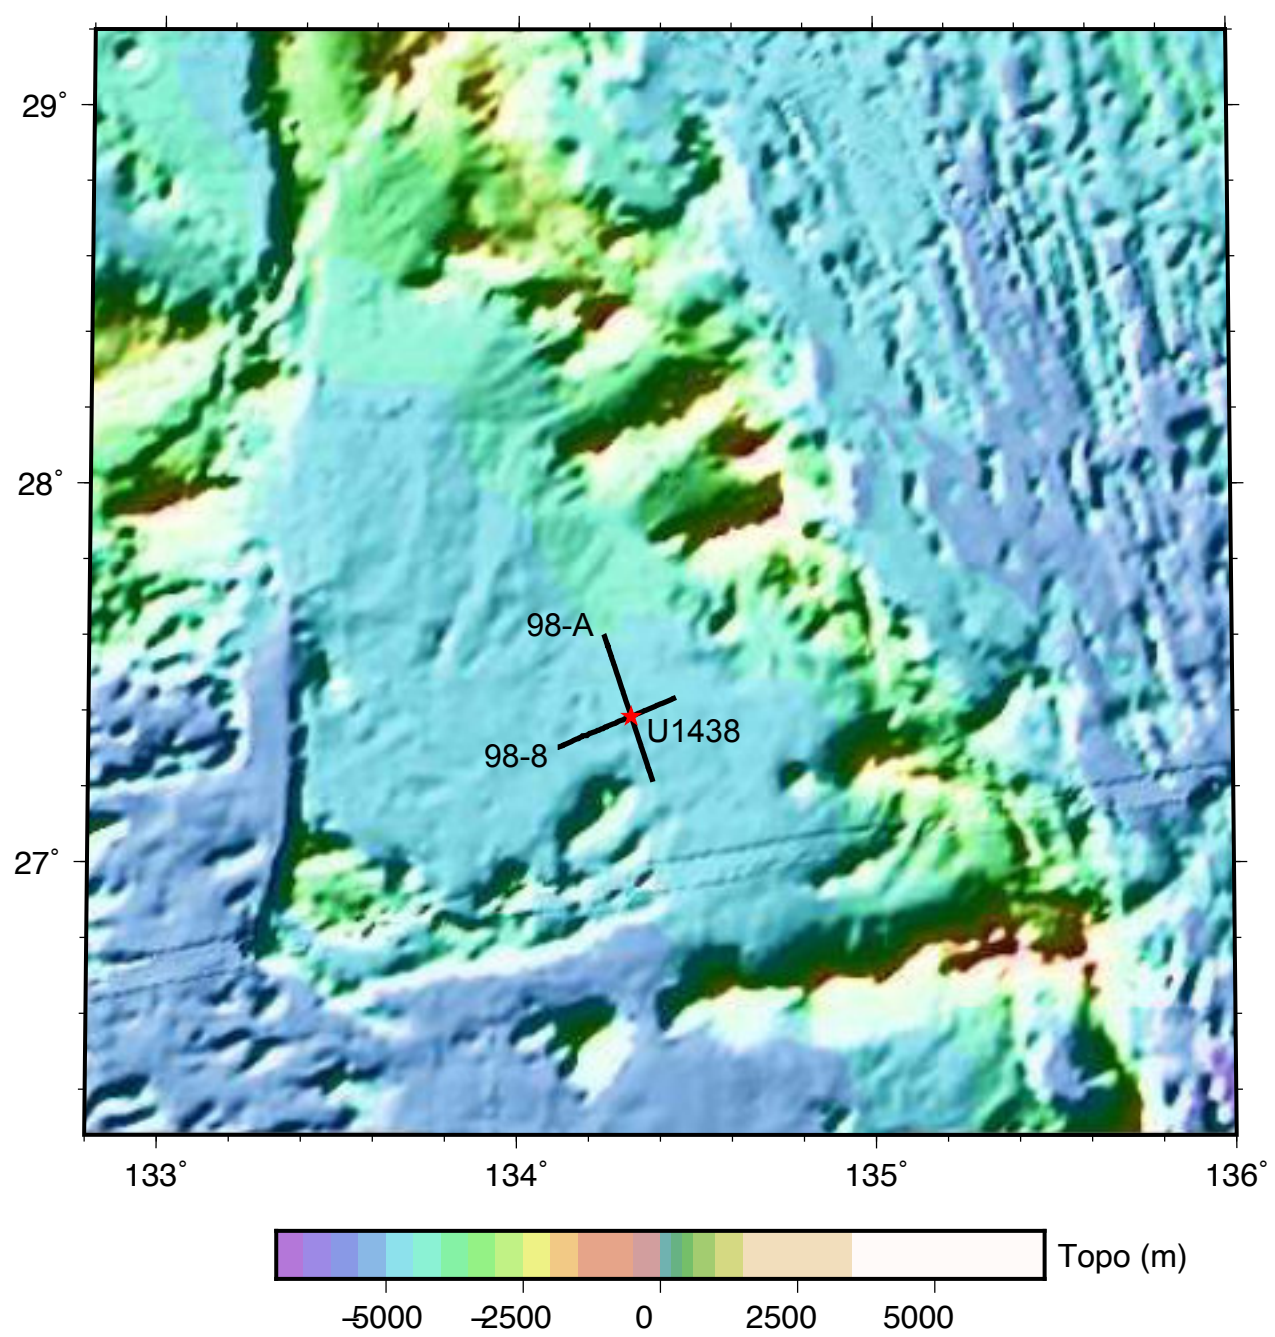

Supplement: Supplementary file 1 [file 3]

## Central West Mariana Ridge

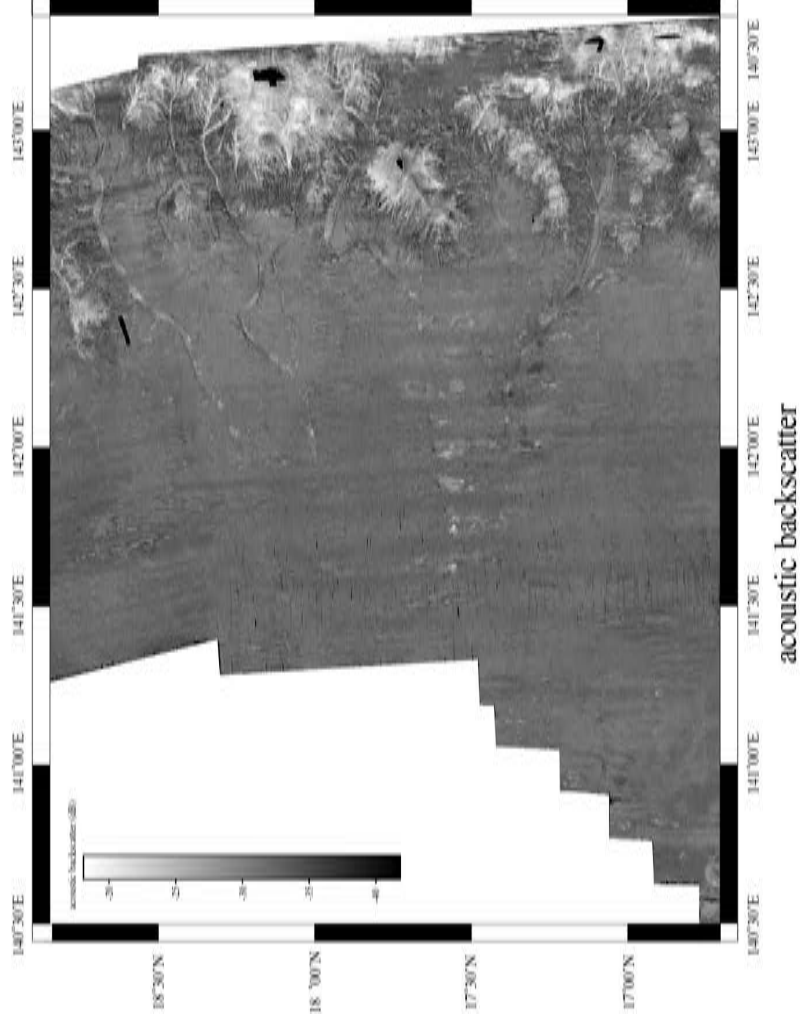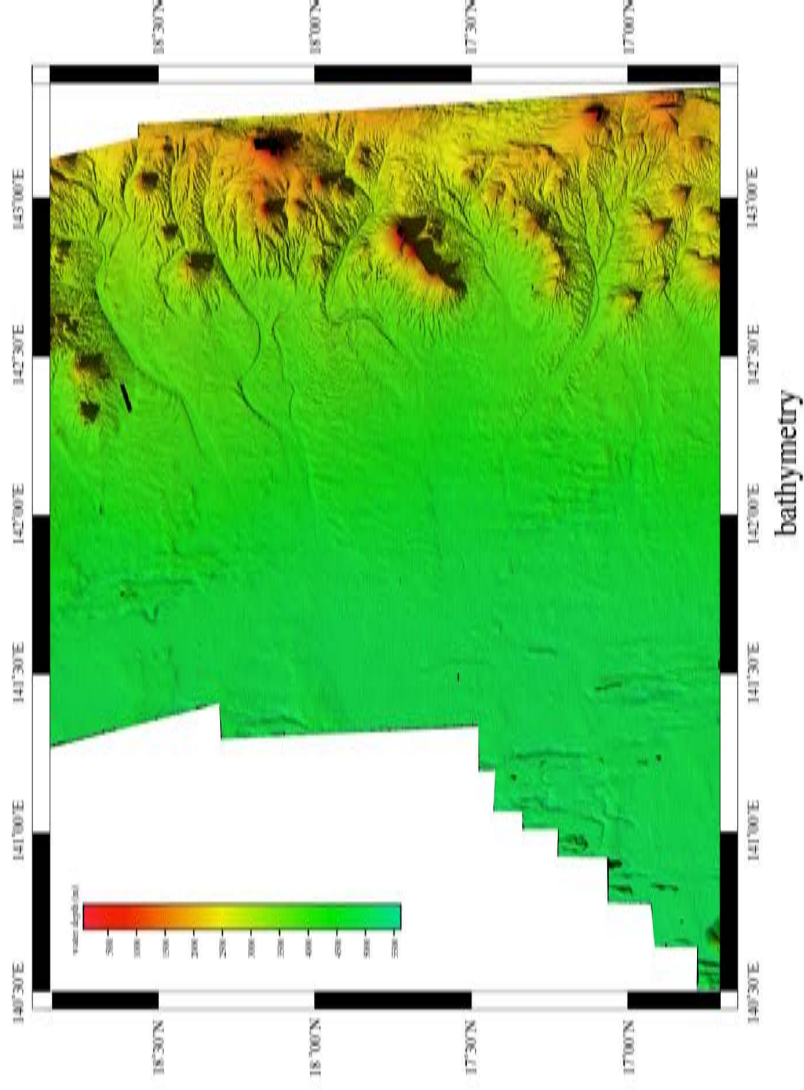

Supplement: Supplementary file 2 [file 3]

A

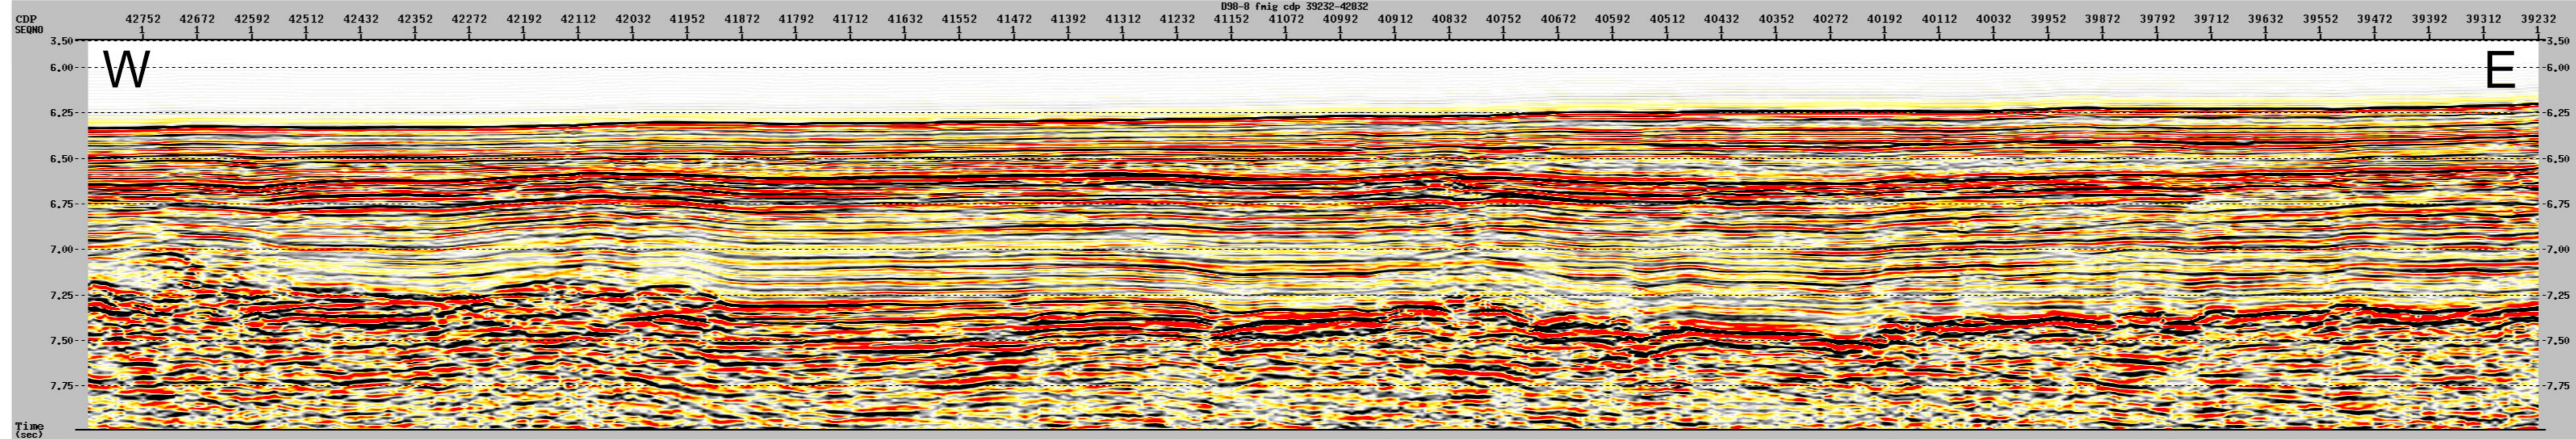

B

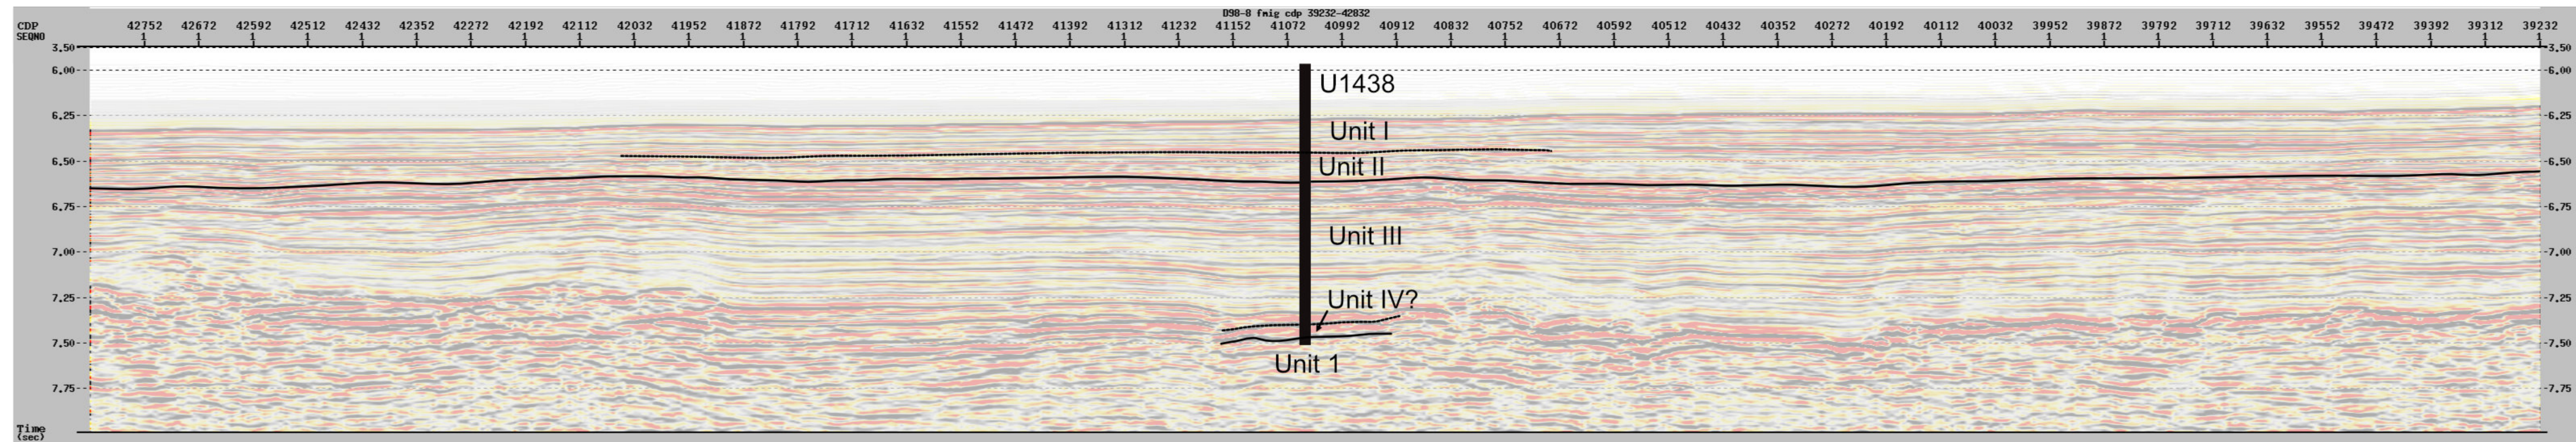 10 km

Supplement: Supplementary file 3 [file 3]

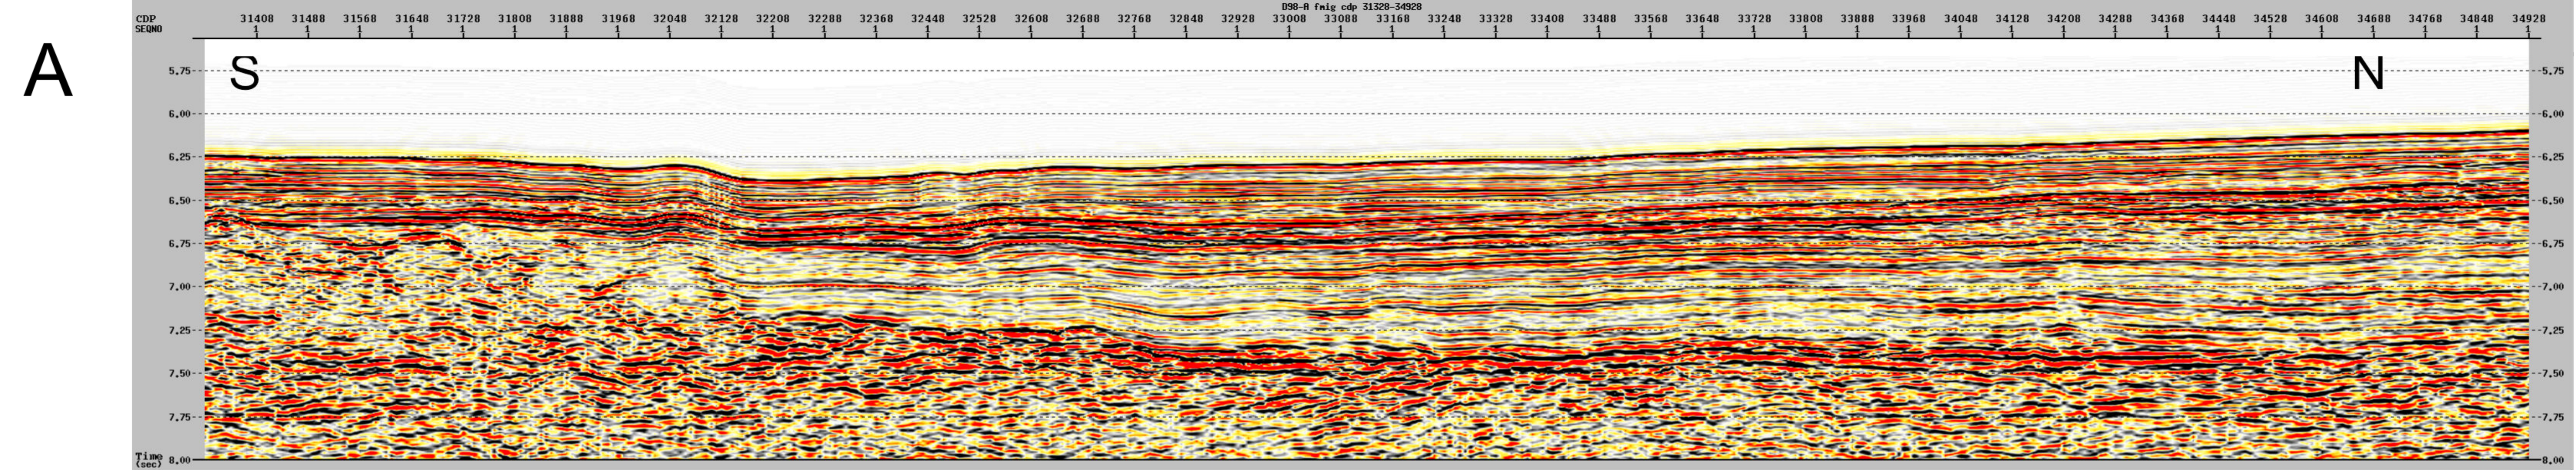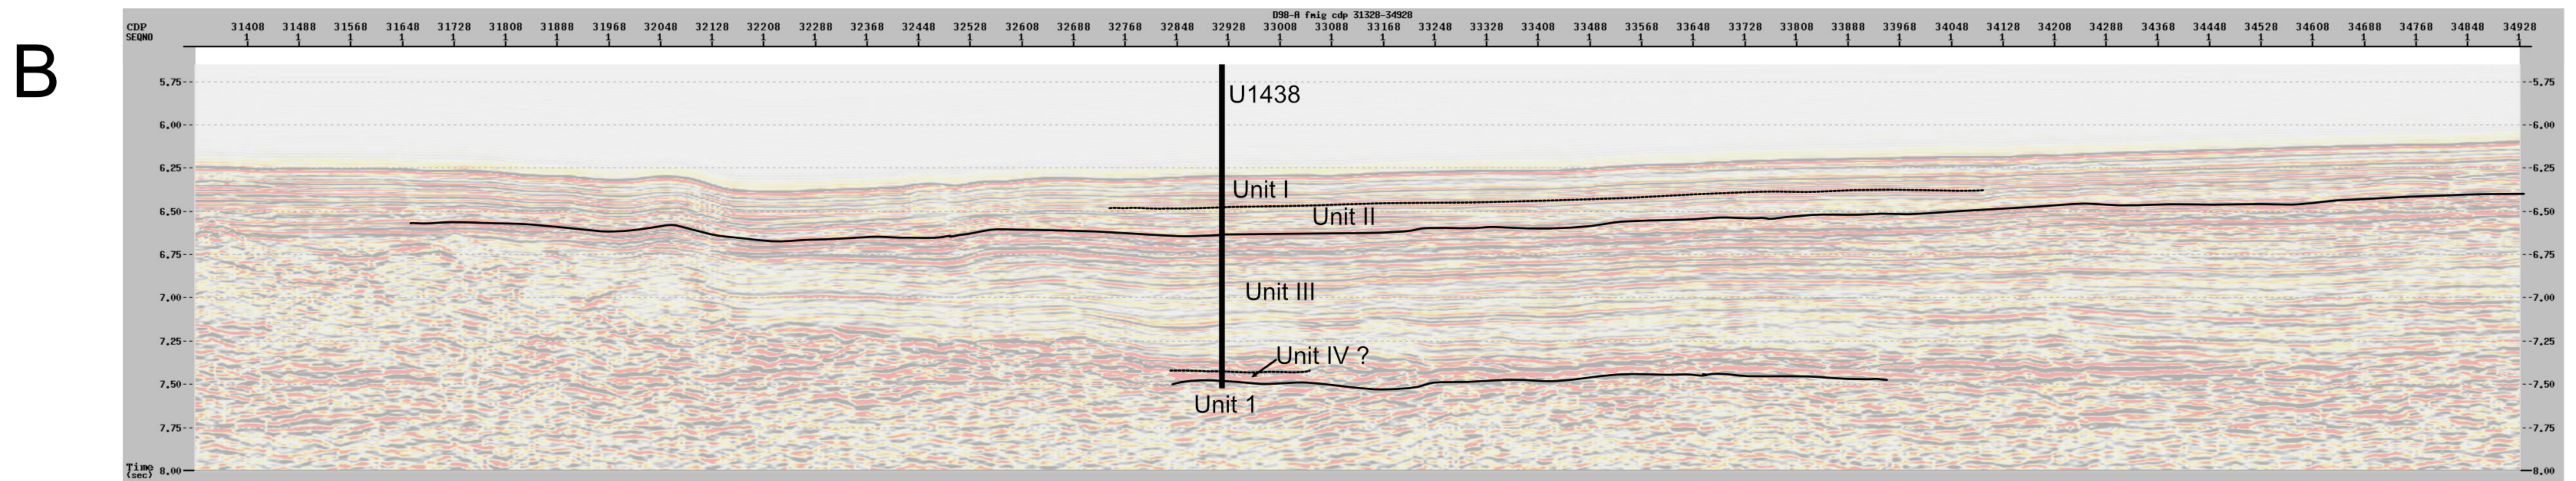

10 km

Supplement: Supplementary file 4 [file 3]
